# Supplementary material for: Examining the Survey Setting Effect on Current E-Cigarette Use Estimates among High School Students in the 2021 National Youth Tobacco Survey
Source: MDPI journal article supplement (doi:10.3390/ijerph19116468), 2022-05-26
Supplement: s1 [file s1]

**Table S1. Adjusted Odds of Past-30-Day E-cigarette Use Among High School Youth in the US, 2021 NYTS (full model results)**

|                         |      |      |      | Model 1    |        |      |                   |        |      | Model 2          |        |      |                   |        |      | Model 3          |        |      |                   |        |      |                  |        |  |
|-------------------------|------|------|------|------------|--------|------|-------------------|--------|------|------------------|--------|------|-------------------|--------|------|------------------|--------|------|-------------------|--------|------|------------------|--------|--|
|                         |      |      |      | Prevalence |        |      | Adjusted (N=9907) |        |      | Matched (N=9941) |        |      | Adjusted (N=9907) |        |      | Matched (N=9941) |        |      | Adjusted (N=9343) |        |      | Matched (N=9377) |        |  |
|                         |      |      |      | %          | 95% CI |      | OR                | 95% CI |      | OR               | 95% CI |      | OR                | 95% CI |      | OR               | 95% CI |      | OR                | 95% CI |      | OR               | 95% CI |  |
| Sex                     |      |      |      |            |        |      |                   |        |      |                  |        |      |                   |        |      |                  |        |      |                   |        |      |                  |        |  |
| Female                  | 11.9 | 10.0 | 13.9 | 1.00       | -      | -    | 1.00              | -      | -    | 1.00             | -      | -    | 1.00              | -      | -    | 1.00             | -      | -    | 1.00              | -      | -    |                  |        |  |
| Male                    | 10.7 | 8.9  | 12.4 | 0.82       | 0.69   | 0.99 | 0.82              | 0.68   | 1.00 | 0.83             | 0.69   | 0.99 | 0.83              | 0.68   | 1.00 | 0.70             | 0.57   | 0.85 | 0.69              | 0.56   | 0.85 |                  |        |  |
| Race/Ethnicity          |      |      |      |            |        |      |                   |        |      |                  |        |      |                   |        |      |                  |        |      |                   |        |      |                  |        |  |
| Non-Hispanic White      | 14.3 | 12.2 | 16.4 | 1.00       | -      | -    | 1.00              | -      | -    | 1.00             | -      | -    | 1.00              | -      | -    | 1.00             | -      | -    | 1.00              | -      | -    |                  |        |  |
| Non-Hispanic Black      | 5.7  | 3.6  | 7.8  | 0.43       | 0.28   | 0.68 | 0.46              | 0.29   | 0.73 | 0.43             | 0.28   | 0.68 | 0.45              | 0.28   | 0.73 | 0.34             | 0.21   | 0.55 | 0.36              | 0.22   | 0.59 |                  |        |  |
| Hispanic                | 7.7  | 5.8  | 9.5  | 0.60       | 0.47   | 0.77 | 0.74              | 0.58   | 0.96 | 0.65             | 0.52   | 0.81 | 0.81              | 0.64   | 1.04 | 0.53             | 0.42   | 0.68 | 0.65              | 0.50   | 0.84 |                  |        |  |
| Non-Hispanic other race | 11.4 | 8.8  | 14.1 | 0.87       | 0.68   | 1.10 | 0.87              | 0.67   | 1.13 | 0.90             | 0.70   | 1.16 | 0.91              | 0.69   | 1.20 | 0.87             | 0.67   | 1.12 | 0.90              | 0.68   | 1.19 |                  |        |  |
| Grade                   |      |      |      |            |        |      |                   |        |      |                  |        |      |                   |        |      |                  |        |      |                   |        |      |                  |        |  |
| 9th                     | 6.6  | 5.0  | 8.2  | 1.00       | -      | -    | 1.00              | -      | -    | 1.00             | -      | -    | 1.00              | -      | -    | 1.00             | -      | -    | 1.00              | -      | -    |                  |        |  |
| 10th                    | 9.3  | 6.9  | 11.6 | 1.53       | 1.12   | 2.09 | 1.68              | 1.19   | 2.36 | 1.54             | 1.12   | 2.10 | 1.68              | 1.19   | 2.36 | 1.56             | 1.14   | 2.14 | 1.69              | 1.20   | 2.38 |                  |        |  |
| 11th                    | 13.4 | 10.9 | 15.9 | 2.29       | 1.71   | 3.05 | 2.46              | 1.80   | 3.36 | 2.31             | 1.73   | 3.08 | 2.48              | 1.82   | 3.38 | 2.43             | 1.83   | 3.24 | 2.70              | 1.98   | 3.68 |                  |        |  |
| 12th                    | 16.2 | 13.6 | 18.9 | 2.85       | 2.10   | 3.87 | 3.01              | 2.18   | 4.17 | 2.86             | 2.09   | 3.90 | 3.03              | 2.18   | 4.21 | 3.07             | 2.26   | 4.17 | 3.35              | 2.42   | 4.64 |                  |        |  |
| Survey Setting          |      |      |      |            |        |      |                   |        |      |                  |        |      |                   |        |      |                  |        |      |                   |        |      |                  |        |  |
| Home                    | 8.2  | 6.8  | 9.6  | 1.00       | -      | -    | 1.00              | -      | -    | 1.00             | -      | -    | 1.00              | -      | -    | 1.00             | -      | -    | 1.00              | -      | -    |                  |        |  |
| School                  | 15.0 | 12.7 | 17.2 | 1.74       | 1.40   | 2.17 | 1.79              | 1.46   | 2.20 | 1.38             | 1.08   | 1.77 | 1.36              | 1.08   | 1.72 | 1.40             | 1.10   | 1.77 | 1.29              | 1.03   | 1.62 |                  |        |  |
| Learning Model          |      |      |      |            |        |      |                   |        |      |                  |        |      |                   |        |      |                  |        |      |                   |        |      |                  |        |  |
| Nearly all at-home      | 7.4  | 5.2  | 9.5  |            |        |      |                   |        |      | 1.00             | -      | -    | 1.00              | -      | -    | 1.00             | -      | -    | 1.00              | -      | -    |                  |        |  |
| Majority at-home        | 8.0  | 4.7  | 11.2 |            |        |      |                   |        |      | 1.02             | 0.62   | 1.66 | 1.13              | 0.67   | 1.89 | 0.96             | 0.58   | 1.59 | 1.09              | 0.66   | 1.81 |                  |        |  |
| About even              | 11.0 | 6.1  | 15.8 |            |        |      |                   |        |      | 1.24             | 0.76   | 2.02 | 1.40              | 0.85   | 2.29 | 1.22             | 0.75   | 1.98 | 1.43              | 0.87   | 2.35 |                  |        |  |
| Majority in-school      | 13.2 | 9.8  | 16.6 |            |        |      |                   |        |      | 1.46             | 1.00   | 2.12 | 1.68              | 1.16   | 2.44 | 1.52             | 1.08   | 2.15 | 1.82              | 1.29   | 2.57 |                  |        |  |
| Nearly all in-school    | 17.0 | 13.8 | 20.2 |            |        |      |                   |        |      | 1.65             | 1.10   | 2.47 | 1.89              | 1.30   | 2.75 | 1.69             | 1.14   | 2.52 | 2.03              | 1.38   | 2.97 |                  |        |  |
| School Grades           |      |      |      |            |        |      |                   |        |      |                  |        |      |                   |        |      |                  |        |      |                   |        |      |                  |        |  |
| Mostly A's              | 7.5  | 6.0  | 8.9  |            |        |      |                   |        |      |                  |        |      |                   |        |      | 1.00             | -      | -    | 1.00              | -      | -    |                  |        |  |
| Mostly B's              | 11.2 | 9.3  | 13.2 |            |        |      |                   |        |      |                  |        |      |                   |        |      | 1.89             | 1.52   | 2.34 | 1.96              | 1.56   | 2.45 |                  |        |  |
| Mostly C's              | 14.6 | 11.2 | 18.0 |            |        |      |                   |        |      |                  |        |      |                   |        |      | 2.83             | 2.21   | 3.62 | 2.91              | 2.24   | 3.78 |                  |        |  |
| Mostly D's              | 15.5 | 10.3 | 20.6 |            |        |      |                   |        |      |                  |        |      |                   |        |      | 3.07             | 1.93   | 4.89 | 3.02              | 1.77   | 5.15 |                  |        |  |
| Mostly F's              | 16.1 | 10.3 | 21.9 |            |        |      |                   |        |      |                  |        |      |                   |        |      | 4.06             | 2.80   | 5.89 | 3.69              | 2.45   | 5.57 |                  |        |  |
| No answer/ Displayed    | 22.6 | 17.3 | 27.8 |            |        |      |                   |        |      |                  |        |      |                   |        |      | 4.82             | 3.57   | 6.52 | 5.33              | 3.84   | 7.38 |                  |        |  |

CI, Confidence Interval; OR, Odds Ratio;

Percentages are weighted to be representative of US high school students; Variance was estimated using Taylor Series Linearization, accounting for the complex sampling design
